# Supplementary material
Source: PubMed Central journal article supplement (PMC3457481)
Supplement: AEM.01188-12_zam999103686so1.pdf [file AEM.01188-12_zam999103686so1.pdf]

# 1            **Regulatable vectors for environmental gene expression in *Alphaproteobacteria***

2  
3    **Adrian J Tett, Steven J Rudder, Alexandre Bourdès, Ramakrishnan Karunakaran, Philip S**  
4    **Poole.**

## 5 6    **Supplementary material**

### 7 8    **Bacterial strains and growth conditions**

9    The bacterial strains used in this study are described in table S1.

10  
11    **Construction of pLMB51.** The *tauA* promoter and *tauR* gene of *S. meliloti* 1021 were PCR  
12    amplified from genomic DNA using primers pr0079 and pr0080 (Table S2) using previously  
13    described conditions (3). A KpnI restriction site was included at the 5' end of each primer to  
14    enable cloning. The PCR product was blunt ligated into vector pJET1.2/blunt (Fermentas).  
15    The insert was excised by KpnI restriction digestion and cloned into KpnI digested vector,  
16    pJP2 forming pLMB51.

17    **Construction pLMB509.** pLMB509 was formed utilising BD In-Fusion™ technology (Clontech)  
18    to combine three linear fragments (two amplified regions derived from pLMB51 and  
19    pRLU1357 and a linearized vector, pRU1097). pRU1097 was linearized by a ClaI and SacI  
20    restriction digest. The *tauAp TauR* region of pLMB51 and the *gfpmut3.1* region of pRU1357  
21    were amplified from purified plasmid preparations using primers pr1266, pr1267 and  
22    pr1268, pr1269 respectively (Table S2). PCR amplifications were performed in 50 µl volume  
23    using 1 unit Phusion polymerase (Thermo scientific), 1 µM primer and 0.2 mM dNTPs.  
24    Cycling conditions were: One cycle of 98°C for 30 s, 30 cycles of 98°C for 10 s, 67°C for 30 s,

25 72°C for 40 s with a final extension for 7 minutes at 72°C. The 5' ends of primers pr1267 and  
26 pr1268 were complementary to the linearized ends of pRU1097, primers pr1266 and pr1269  
27 were complementary to a region of pRU1357 and pLMB51 respectively. These fragments  
28 were combined using the BD method in a 3:3:1 ratio (insert:insert:backbone) using  
29 manufactures reaction conditions. Additional features incorporated into the primers are  
30 given in table S2.

31

## 32 **References supplementary material**

33

- 34 1. **Figurski, D. H., and D. R. Helinski.** 1979. Replication of an origin-containing  
35 derivative of plasmid Rk2 dependent on a plasmid function provided in trans.  
36 Proc. Natl. Acad. Sci. U.S.A. **76**:1648-1652.
- 37 2. **Johnston, A. W. B., and J. E. Beringer.** 1975. Identification of *Rhizobium*  
38 strains in pea root nodules using genetic markers. J. Gen. Microbiol. **87**:343-  
39 350.
- 40 3. **Karunakaran, R., T. H. Mauchline, A. H. F. Hosie, and P. S. Poole.** 2005. A  
41 family of promoter probe vectors incorporating autofluorescent and  
42 chromogenic reporter proteins for studying gene expression in Gram-negative  
43 bacteria. Microbiology **151**:3249-3256.
- 44 4. **Mauchline, T. H., J. E. Fowler, A. K. East, A. L. Sartor, R. Zaheer, A. H. F.**  
45 **Hosie, P. S. Poole, and T. M. Finan.** 2006. Mapping the *Sinorhizobium*  
46 *meliloti* 1021 solute-binding protein-dependent transportome. Proc. Natl.  
47 Acad. Sci. U.S.A. **103**:17933-17938.
- 48 5. **Meade, H. M., S. R. Long, G. B. Ruvkun, S. E. Brown, and F. M. Ausubel.**  
49 1982. Physical and genetic-characterization of symbiotic and auxotrophic

- 50 mutants of *Rhizobium meliloti* induced by transposon Tn5 mutagenesis. J.  
51 Bacteriol. **149**:114-122.
- 52 6. **Noel, K. D., A. Sanchez, L. Fernandez, J. Leemans, and M. A. Cevallos.**  
53 1984. *Rhizobium phaseoli* symbiotic mutants with transposon Tn5 insertions.  
54 J. Bacteriol. **158**:148-155.
- 55 7. **Prell, J., B. Boesten, P. Poole, and U. B. Priefer.** 2002. The *Rhizobium*  
56 *leguminosarum* bv. *viciae* VF39 gamma-aminobutyrate (GABA)  
57 aminotransferase gene (*gabT*) is induced by GABA and highly expressed in  
58 bacteroids. Microbiology **148**:615-623.
- 59 8. **Sockett, R. E., J. C. A. Foster, and J. P. Armitage.** 1990. Molecular biology  
60 of the *Rhodobacter sphaeroides* flagellum. Molecular Biology of Membrane-  
61 Bound Complexes in Phototrophic Bacteria **53**:473-478.
- 62 9. **Trinick, M. J.** 1973. Symbiosis between *Rhizobium* and Non-Legume, *Trema*  
63 *aspera*. Nature **244**:459-460.

64  
65  
66  
67  
68  
69  
70  
71  
72  
73  
74  
75

| Strain or plasmid                     | Description                                                                                                                                                                                                                       | Source/reference |
|---------------------------------------|-----------------------------------------------------------------------------------------------------------------------------------------------------------------------------------------------------------------------------------|------------------|
| <b><i>Escherichia. coli</i></b>       |                                                                                                                                                                                                                                   |                  |
| <i>E. coli</i> $\alpha$ -select       | F <sup>-</sup> <i>deoR endA1 recA1 relA1 gyrA96 hsdR17</i> (r <sub>k</sub> <sup>-</sup> , m <sub>k</sub> <sup>+</sup> ) <i>supE44 thi-1 phoA</i> $\Delta$ ( <i>lacZYA argF</i> )U169 $\Phi$ 80 <i>lacZ</i> $\Delta$ M15 $\lambda$ | Bioline          |
| <b><i>Rhizobium leguminosarum</i></b> |                                                                                                                                                                                                                                   |                  |
| Rlv3841                               | Str <sup>r</sup> derivative of <i>R. leguminosarum</i> bv <i>viciae</i> 300                                                                                                                                                       | (2)              |
| LMB150                                | Rlv3841 Containing pLMB51                                                                                                                                                                                                         | This work        |
| LMB434                                | Rlv3841 containing pLMB509                                                                                                                                                                                                        | This work        |
| RU4125                                | Rlv3841 Containing pRU1357                                                                                                                                                                                                        | (4)              |
| LMB461                                | Rlv3841 Containing pRU548                                                                                                                                                                                                         | This work        |
| <b><i>Rhizobium. etli</i></b>         |                                                                                                                                                                                                                                   |                  |
| CE3                                   | Str <sup>r</sup> derivative of <i>R. etli</i> CFN42                                                                                                                                                                               | (6)              |
| LMB470                                | Rlv3841 Containing pLMB51                                                                                                                                                                                                         | This work        |
| <b><i>Rhizobium sp</i></b>            |                                                                                                                                                                                                                                   |                  |
| NGR234                                |                                                                                                                                                                                                                                   | (9)              |
| LMB469                                | NG234 Containing pLMB51                                                                                                                                                                                                           | This work        |
| <b><i>Sinorhizobium meliloti</i></b>  |                                                                                                                                                                                                                                   |                  |
| 1021                                  |                                                                                                                                                                                                                                   | (5)              |
| RU2041                                | 1021 Containing pRU1357                                                                                                                                                                                                           | (4)              |
| LMB152                                | 1021 Containing pLMB51                                                                                                                                                                                                            | This work        |
| <b><i>Rhodobacter sphaeriodes</i></b> |                                                                                                                                                                                                                                   |                  |
| WS8N                                  | Nal <sup>r</sup> derivative of <i>R. sphaeriodes</i> WS8                                                                                                                                                                          | (8)              |
| LMB422                                | WS8N Containing pLMB51                                                                                                                                                                                                            | This work        |
| <b>Plasmids</b>                       |                                                                                                                                                                                                                                   |                  |
| pRK2013                               | Km <sup>r</sup> , ColE1 replicon with RK2 <i>tra</i> genes. Used to conjugate mob <sup>+</sup> plasmids from <i>E.coli</i> to <i>Alphaproteobacteria</i>                                                                          | (1)              |
| pLMB51                                | Tc <sup>r</sup> , pJP2 backbone containing <i>tauAp</i> and <i>tauR</i> from 1021                                                                                                                                                 | This work        |
| pLMB509                               | Gm <sup>r</sup> , pRU1097 backbone with <i>tauAp</i> , <i>tauR</i> from 1021 and a His-tagged protein ( <i>gfpmut3.1</i> )                                                                                                        | This work        |

|         |                                                                                                                     |           |
|---------|---------------------------------------------------------------------------------------------------------------------|-----------|
| pRU1357 | Gm <sup>r</sup> , pRU1097 backbone with <i>tauAp</i> upstream of <i>gfpmut3.1</i> but without <i>tauR</i> regulator | (4)       |
| pRU1097 | Gm <sup>r</sup> promoter probe vector with a promoter-less <i>gfpmut3.1</i>                                         | (3)       |
| pJP2    | Tc <sup>r</sup> , stable broad host range cloning vector                                                            | (7)       |
| pLMB548 | Gm <sup>r</sup> , Solute binding protein SMc02774 in vector pLMB509                                                 | This work |

76 **TABLE S1.** Bacterial strains and plasmids used in this study (Abbreviations Gm, Gentamycin,  
77 Km, Kanamycin, Nal, Nalidixic acid, Str, Streptomycin, Tc, Tetracycline)

78  
79

| Primer | Sequence                                                                | Gene/comment                                                                                                        |
|--------|-------------------------------------------------------------------------|---------------------------------------------------------------------------------------------------------------------|
| pr1266 | GTTCTTCTCCTTTACGCATATGTTCTTCCTCCTGTC<br>GTTACCCTCTTTGGTT                | <i>tauAp</i> and <i>tauR</i> reverse.<br>5' pRU1357 complementary region                                            |
| pr1267 | CGGATCTAGATATCGATACCCCGCTCCGCGATCC<br>GCG                               | <i>tauAp</i> and <i>tauR</i> forward.<br>5' pRU1097 complementary region                                            |
| pr1268 | ATTCATTATTTGTAGAGCTCTTAGTGATGATGGT<br>GATGATGCATATGTTTGTATAGTTCATCCATGC | <i>gfpmut3.1</i> reverse.<br>Contains NdeI RE site, 6 His-tag and<br>stop codon. 5' pRU1097<br>complementary region |
| pr1269 | AACCAAAGAGGGTAACGACAGGAGGAAGAACA<br>TATGCGTAAAGGAGAAGAAC                | <i>gfpmut3.1</i> forward.<br>5' pLMB51 complementary region                                                         |
| pr0079 | GGTACCTCTGCAAGGCTCATTCTAACC                                             | <i>tauAp</i> and <i>tauR</i> forward<br>5' KpnI RE site                                                             |
| pr0080 | GGTACCCTACATGTCGTTACCCTCTTTGGTTA                                        | <i>tauAp</i> and <i>tauR</i> reverse<br>5' KpnI RE site                                                             |

80

81 **TABLE S2.** Primers used in this study

82
